# Supplementary material
Source: ML conference proceedings conference paper supplement (https://proceedings.neurips.cc/paper_files/paper/2022/hash/488b8db9ec118c3d750c34d1812a5a3a-Abstract.html)
Supplement: Supplementary file 1 [file 488b8db9ec118c3d750c34d1812a5a3a-Supplemental-Conference.zip]

Archive with 418 entries (364 files):
- released_code 3/
- __MACOSX/._released_code 3
- released_code 3/.DS_Store
- __MACOSX/released_code 3/._.DS_Store
- released_code 3/Ada_MinMax_Neurips_2022_CM.pdf
- __MACOSX/released_code 3/._Ada_MinMax_Neurips_2022_CM.pdf
- released_code 3/test_func/
- __MACOSX/released_code 3/._test_func
- released_code 3/README.md
- __MACOSX/released_code 3/._README.md
- released_code 3/distributional_robust/
- __MACOSX/released_code 3/._distributional_robust
- released_code 3/test_func/.DS_Store
- __MACOSX/released_code 3/test_func/._.DS_Store
- released_code 3/test_func/run.sh
- __MACOSX/released_code 3/test_func/._run.sh
- released_code 3/test_func/main.py
- __MACOSX/released_code 3/test_func/._main.py
- released_code 3/distributional_robust/.DS_Store
- __MACOSX/released_code 3/distributional_robust/._.DS_Store
- released_code 3/distributional_robust/run.sh
- __MACOSX/released_code 3/distributional_robust/._run.sh
- released_code 3/distributional_robust/run_mnist.sh
- __MACOSX/released_code 3/distributional_robust/._run_mnist.sh
- released_code 3/distributional_robust/logs/
- __MACOSX/released_code 3/distributional_robust/._logs
- released_code 3/distributional_robust/.ipynb_checkpoints/
- __MACOSX/released_code 3/distributional_robust/._.ipynb_checkpoints
- released_code 3/distributional_robust/.remote/
- __MACOSX/released_code 3/distributional_robust/._.remote
- released_code 3/distributional_robust/main.py
- __MACOSX/released_code 3/distributional_robust/._main.py
- released_code 3/distributional_robust/mnist.py
- __MACOSX/released_code 3/distributional_robust/._mnist.py
- released_code 3/distributional_robust/.ipynb_checkpoints/ift6135_projet-checkpoint.ipynb
- __MACOSX/released_code 3/distributional_robust/.ipynb_checkpoints/._ift6135_projet-checkpoint.ipynb
- released_code 3/distributional_robust/.remote/configs.yaml
- __MACOSX/released_code 3/distributional_robust/.remote/._configs.yaml
- released_code 3/distributional_robust/.remote/logs/
- __MACOSX/released_code 3/distributional_robust/.remote/._logs
- released_code 3/distributional_robust/.remote/exclude.txt
- __MACOSX/released_code 3/distributional_robust/.remote/._exclude.txt
- released_code 3/distributional_robust/.remote/logs/rsync_default_0034/
- __MACOSX/released_code 3/distributional_robust/.remote/logs/._rsync_default_0034
- released_code 3/distributional_robust/.remote/logs/rsync_default_0033/
- __MACOSX/released_code 3/distributional_robust/.remote/logs/._rsync_default_0033
- released_code 3/distributional_robust/.remote/logs/rsync_default_0005/
- __MACOSX/released_code 3/distributional_robust/.remote/logs/._rsync_default_0005
- released_code 3/distributional_robust/.remote/logs/rsync_default_0002/
- __MACOSX/released_code 3/distributional_robust/.remote/logs/._rsync_default_0002
- released_code 3/distributional_robust/.remote/logs/rsync_default_0003/
- __MACOSX/released_code 3/distributional_robust/.remote/logs/._rsync_default_0003
- released_code 3/distributional_robust/.remote/logs/rsync_default_0004/
- __MACOSX/released_code 3/distributional_robust/.remote/logs/._rsync_default_0004
- released_code 3/distributional_robust/.remote/logs/rsync_default_0032/
- __MACOSX/released_code 3/distributional_robust/.remote/logs/._rsync_default_0032
- released_code 3/distributional_robust/.remote/logs/rsync_default_0035/
- __MACOSX/released_code 3/distributional_robust/.remote/logs/._rsync_default_0035
- released_code 3/distributional_robust/.remote/logs/rsync_default_0017/
- __MACOSX/released_code 3/distributional_robust/.remote/logs/._rsync_default_0017
- released_code 3/distributional_robust/.remote/logs/rsync_default_0028/
- __MACOSX/released_code 3/distributional_robust/.remote/logs/._rsync_default_0028
- released_code 3/distributional_robust/.remote/logs/rsync_default_0010/
- __MACOSX/released_code 3/distributional_robust/.remote/logs/._rsync_default_0010
- released_code 3/distributional_robust/.remote/logs/rsync_default_0026/
- __MACOSX/released_code 3/distributional_robust/.remote/logs/._rsync_default_0026
- released_code 3/distributional_robust/.remote/logs/rsync_default_0019/
- __MACOSX/released_code 3/distributional_robust/.remote/logs/._rsync_default_0019
- released_code 3/distributional_robust/.remote/logs/rsync_default_0021/
- __MACOSX/released_code 3/distributional_robust/.remote/logs/._rsync_default_0021
- released_code 3/distributional_robust/.remote/logs/rsync_default_0044/
- __MACOSX/released_code 3/distributional_robust/.remote/logs/._rsync_default_0044
- released_code 3/distributional_robust/.remote/logs/rsync_default_0043/
- __MACOSX/released_code 3/distributional_robust/.remote/logs/._rsync_default_0043
- released_code 3/distributional_robust/.remote/logs/rsync_default_0020/
- __MACOSX/released_code 3/distributional_robust/.remote/logs/._rsync_default_0020
- released_code 3/distributional_robust/.remote/logs/rsync_default_0027/
- __MACOSX/released_code 3/distributional_robust/.remote/logs/._rsync_default_0027
- released_code 3/distributional_robust/.remote/logs/rsync_default_0018/
- __MACOSX/released_code 3/distributional_robust/.remote/logs/._rsync_default_0018
- released_code 3/distributional_robust/.remote/logs/rsync_default_0011/
- __MACOSX/released_code 3/distributional_robust/.remote/logs/._rsync_default_0011
- released_code 3/distributional_robust/.remote/logs/rsync_default_0016/
- __MACOSX/released_code 3/distributional_robust/.remote/logs/._rsync_default_0016
- released_code 3/distributional_robust/.remote/logs/rsync_default_0029/
- __MACOSX/released_code 3/distributional_robust/.remote/logs/._rsync_default_0029
- released_code 3/distributional_robust/.remote/logs/rsync_default_0042/
- __MACOSX/released_code 3/distributional_robust/.remote/logs/._rsync_default_0042
- released_code 3/distributional_robust/.remote/logs/rsync_default_0045/
- __MACOSX/released_code 3/distributional_robust/.remote/logs/._rsync_default_0045
- released_code 3/distributional_robust/.remote/logs/rsync_default_0030/
- __MACOSX/released_code 3/distributional_robust/.remote/logs/._rsync_default_0030
- released_code 3/distributional_robust/.remote/logs/rsync_default_0008/
- __MACOSX/released_code 3/distributional_robust/.remote/logs/._rsync_default_0008
- released_code 3/distributional_robust/.remote/logs/rsync_default_0037/
- __MACOSX/released_code 3/distributional_robust/.remote/logs/._rsync_default_0037
- released_code 3/distributional_robust/.remote/logs/rsync_default_0001/
- __MACOSX/released_code 3/distributional_robust/.remote/logs/._rsync_default_0001
- released_code 3/distributional_robust/.remote/logs/rsync_default_0039/
- __MACOSX/released_code 3/distributional_robust/.remote/logs/._rsync_default_0039
- released_code 3/distributional_robust/.remote/logs/rsync_default_0006/
- __MACOSX/released_code 3/distributional_robust/.remote/logs/._rsync_default_0006
- released_code 3/distributional_robust/.remote/logs/rsync_default_0038/
- __MACOSX/released_code 3/distributional_robust/.remote/logs/._rsync_default_0038
- released_code 3/distributional_robust/.remote/logs/rsync_default_0007/
- __MACOSX/released_code 3/distributional_robust/.remote/logs/._rsync_default_0007
- released_code 3/distributional_robust/.remote/logs/rsync_default_0009/
- __MACOSX/released_code 3/distributional_robust/.remote/logs/._rsync_default_0009
- released_code 3/distributional_robust/.remote/logs/rsync_default_0036/
- __MACOSX/released_code 3/distributional_robust/.remote/logs/._rsync_default_0036
- released_code 3/distributional_robust/.remote/logs/rsync_default_0031/
- __MACOSX/released_code 3/distributional_robust/.remote/logs/._rsync_default_0031
- released_code 3/distributional_robust/.remote/logs/rsync_default_0040/
- __MACOSX/released_code 3/distributional_robust/.remote/logs/._rsync_default_0040
- released_code 3/distributional_robust/.remote/logs/rsync_default_0047/
- __MACOSX/released_code 3/distributional_robust/.remote/logs/._rsync_default_0047
- released_code 3/distributional_robust/.remote/logs/rsync_default_0013/
- __MACOSX/released_code 3/distributional_robust/.remote/logs/._rsync_default_0013
- released_code 3/distributional_robust/.remote/logs/rsync_default_0014/
- __MACOSX/released_code 3/distributional_robust/.remote/logs/._rsync_default_0014
- released_code 3/distributional_robust/.remote/logs/rsync_default_0022/
- __MACOSX/released_code 3/distributional_robust/.remote/logs/._rsync_default_0022
- released_code 3/distributional_robust/.remote/logs/rsync_default_0025/
- __MACOSX/released_code 3/distributional_robust/.remote/logs/._rsync_default_0025
- released_code 3/distributional_robust/.remote/logs/rsync_default_0046/
- __MACOSX/released_code 3/distributional_robust/.remote/logs/._rsync_default_0046
- released_code 3/distributional_robust/.remote/logs/rsync_default_0041/
- __MACOSX/released_code 3/distributional_robust/.remote/logs/._rsync_default_0041
- released_code 3/distributional_robust/.remote/logs/rsync_default_0024/
- __MACOSX/released_code 3/distributional_robust/.remote/logs/._rsync_default_0024
- released_code 3/distributional_robust/.remote/logs/rsync_default_0023/
- __MACOSX/released_code 3/distributional_robust/.remote/logs/._rsync_default_0023
- released_code 3/distributional_robust/.remote/logs/rsync_default_0015/
- __MACOSX/released_code 3/distributional_robust/.remote/logs/._rsync_default_0015
- released_code 3/distributional_robust/.remote/logs/rsync_default_0012/
- __MACOSX/released_code 3/distributional_robust/.remote/logs/._rsync_default_0012
- released_code 3/distributional_robust/.remote/logs/rsync_default_0034/stderr.log
- __MACOSX/released_code 3/distributional_robust/.remote/logs/rsync_default_0034/._stderr.log
- released_code 3/distributional_robust/.remote/logs/rsync_default_0034/stdout.log
- __MACOSX/released_code 3/distributional_robust/.remote/logs/rsync_default_0034/._stdout.log
- released_code 3/distributional_robust/.remote/logs/rsync_default_0034/exit_code
- __MACOSX/released_code 3/distributional_robust/.remote/logs/rsync_default_0034/._exit_code
- released_code 3/distributional_robust/.remote/logs/rsync_default_0033/stderr.log
- __MACOSX/released_code 3/distributional_robust/.remote/logs/rsync_default_0033/._stderr.log
- released_code 3/distributional_robust/.remote/logs/rsync_default_0033/stdout.log
- __MACOSX/released_code 3/distributional_robust/.remote/logs/rsync_default_0033/._stdout.log
- released_code 3/distributional_robust/.remote/logs/rsync_default_0033/exit_code
- __MACOSX/released_code 3/distributional_robust/.remote/logs/rsync_default_0033/._exit_code
- released_code 3/distributional_robust/.remote/logs/rsync_default_0005/stderr.log
- __MACOSX/released_code 3/distributional_robust/.remote/logs/rsync_default_0005/._stderr.log
- released_code 3/distributional_robust/.remote/logs/rsync_default_0005/stdout.log
- __MACOSX/released_code 3/distributional_robust/.remote/logs/rsync_default_0005/._stdout.log
- released_code 3/distributional_robust/.remote/logs/rsync_default_0005/exit_code
- __MACOSX/released_code 3/distributional_robust/.remote/logs/rsync_default_0005/._exit_code
- released_code 3/distributional_robust/.remote/logs/rsync_default_0002/stderr.log
- __MACOSX/released_code 3/distributional_robust/.remote/logs/rsync_default_0002/._stderr.log
- released_code 3/distributional_robust/.remote/logs/rsync_default_0002/stdout.log
- __MACOSX/released_code 3/distributional_robust/.remote/logs/rsync_default_0002/._stdout.log
- released_code 3/distributional_robust/.remote/logs/rsync_default_0002/exit_code
- __MACOSX/released_code 3/distributional_robust/.remote/logs/rsync_default_0002/._exit_code
- released_code 3/distributional_robust/.remote/logs/rsync_default_0003/stderr.log
- __MACOSX/released_code 3/distributional_robust/.remote/logs/rsync_default_0003/._stderr.log
- released_code 3/distributional_robust/.remote/logs/rsync_default_0003/stdout.log
- __MACOSX/released_code 3/distributional_robust/.remote/logs/rsync_default_0003/._stdout.log
- released_code 3/distributional_robust/.remote/logs/rsync_default_0003/exit_code
- __MACOSX/released_code 3/distributional_robust/.remote/logs/rsync_default_0003/._exit_code
- released_code 3/distributional_robust/.remote/logs/rsync_default_0004/stderr.log
- __MACOSX/released_code 3/distributional_robust/.remote/logs/rsync_default_0004/._stderr.log
- released_code 3/distributional_robust/.remote/logs/rsync_default_0004/stdout.log
- __MACOSX/released_code 3/distributional_robust/.remote/logs/rsync_default_0004/._stdout.log
- released_code 3/distributional_robust/.remote/logs/rsync_default_0004/exit_code
- __MACOSX/released_code 3/distributional_robust/.remote/logs/rsync_default_0004/._exit_code
- released_code 3/distributional_robust/.remote/logs/rsync_default_0032/stderr.log
- __MACOSX/released_code 3/distributional_robust/.remote/logs/rsync_default_0032/._stderr.log
- released_code 3/distributional_robust/.remote/logs/rsync_default_0032/stdout.log
- __MACOSX/released_code 3/distributional_robust/.remote/logs/rsync_default_0032/._stdout.log
- released_code 3/distributional_robust/.remote/logs/rsync_default_0032/exit_code
- __MACOSX/released_code 3/distributional_robust/.remote/logs/rsync_default_0032/._exit_code
- released_code 3/distributional_robust/.remote/logs/rsync_default_0035/stderr.log
- __MACOSX/released_code 3/distributional_robust/.remote/logs/rsync_default_0035/._stderr.log
- released_code 3/distributional_robust/.remote/logs/rsync_default_0035/stdout.log
- __MACOSX/released_code 3/distributional_robust/.remote/logs/rsync_default_0035/._stdout.log
- released_code 3/distributional_robust/.remote/logs/rsync_default_0035/exit_code
- __MACOSX/released_code 3/distributional_robust/.remote/logs/rsync_default_0035/._exit_code
- released_code 3/distributional_robust/.remote/logs/rsync_default_0017/stderr.log
- __MACOSX/released_code 3/distributional_robust/.remote/logs/rsync_default_0017/._stderr.log
- released_code 3/distributional_robust/.remote/logs/rsync_default_0017/stdout.log
- __MACOSX/released_code 3/distributional_robust/.remote/logs/rsync_default_0017/._stdout.log
- released_code 3/distributional_robust/.remote/logs/rsync_default_0017/exit_code
- __MACOSX/released_code 3/distributional_robust/.remote/logs/rsync_default_0017/._exit_code
- released_code 3/distributional_robust/.remote/logs/rsync_default_0028/stderr.log
- __MACOSX/released_code 3/distributional_robust/.remote/logs/rsync_default_0028/._stderr.log
- released_code 3/distributional_robust/.remote/logs/rsync_default_0028/stdout.log
- __MACOSX/released_code 3/distributional_robust/.remote/logs/rsync_default_0028/._stdout.log
- released_code 3/distributional_robust/.remote/logs/rsync_default_0028/exit_code
- __MACOSX/released_code 3/distributional_robust/.remote/logs/rsync_default_0028/._exit_code
- released_code 3/distributional_robust/.remote/logs/rsync_default_0010/stderr.log
- __MACOSX/released_code 3/distributional_robust/.remote/logs/rsync_default_0010/._stderr.log
- released_code 3/distributional_robust/.remote/logs/rsync_default_0010/stdout.log
- __MACOSX/released_code 3/distributional_robust/.remote/logs/rsync_default_0010/._stdout.log
- released_code 3/distributional_robust/.remote/logs/rsync_default_0010/exit_code
- __MACOSX/released_code 3/distributional_robust/.remote/logs/rsync_default_0010/._exit_code
- released_code 3/distributional_robust/.remote/logs/rsync_default_0026/stderr.log
- __MACOSX/released_code 3/distributional_robust/.remote/logs/rsync_default_0026/._stderr.log
- released_code 3/distributional_robust/.remote/logs/rsync_default_0026/stdout.log
- __MACOSX/released_code 3/distributional_robust/.remote/logs/rsync_default_0026/._stdout.log
- released_code 3/distributional_robust/.remote/logs/rsync_default_0026/exit_code
- __MACOSX/released_code 3/distributional_robust/.remote/logs/rsync_default_0026/._exit_code
- released_code 3/distributional_robust/.remote/logs/rsync_default_0019/stderr.log
- __MACOSX/released_code 3/distributional_robust/.remote/logs/rsync_default_0019/._stderr.log
- released_code 3/distributional_robust/.remote/logs/rsync_default_0019/stdout.log
- __MACOSX/released_code 3/distributional_robust/.remote/logs/rsync_default_0019/._stdout.log
- released_code 3/distributional_robust/.remote/logs/rsync_default_0019/exit_code
- __MACOSX/released_code 3/distributional_robust/.remote/logs/rsync_default_0019/._exit_code
- released_code 3/distributional_robust/.remote/logs/rsync_default_0021/stderr.log
- __MACOSX/released_code 3/distributional_robust/.remote/logs/rsync_default_0021/._stderr.log
- released_code 3/distributional_robust/.remote/logs/rsync_default_0021/stdout.log
- __MACOSX/released_code 3/distributional_robust/.remote/logs/rsync_default_0021/._stdout.log
- released_code 3/distributional_robust/.remote/logs/rsync_default_0021/exit_code
- __MACOSX/released_code 3/distributional_robust/.remote/logs/rsync_default_0021/._exit_code
- released_code 3/distributional_robust/.remote/logs/rsync_default_0044/stderr.log
- __MACOSX/released_code 3/distributional_robust/.remote/logs/rsync_default_0044/._stderr.log
- released_code 3/distributional_robust/.remote/logs/rsync_default_0044/stdout.log
- __MACOSX/released_code 3/distributional_robust/.remote/logs/rsync_default_0044/._stdout.log
- released_code 3/distributional_robust/.remote/logs/rsync_default_0044/exit_code
- __MACOSX/released_code 3/distributional_robust/.remote/logs/rsync_default_0044/._exit_code
- released_code 3/distributional_robust/.remote/logs/rsync_default_0043/stderr.log
- __MACOSX/released_code 3/distributional_robust/.remote/logs/rsync_default_0043/._stderr.log
- released_code 3/distributional_robust/.remote/logs/rsync_default_0043/stdout.log
- __MACOSX/released_code 3/distributional_robust/.remote/logs/rsync_default_0043/._stdout.log
- released_code 3/distributional_robust/.remote/logs/rsync_default_0043/exit_code
- __MACOSX/released_code 3/distributional_robust/.remote/logs/rsync_default_0043/._exit_code
- released_code 3/distributional_robust/.remote/logs/rsync_default_0020/stderr.log
- __MACOSX/released_code 3/distributional_robust/.remote/logs/rsync_default_0020/._stderr.log
- released_code 3/distributional_robust/.remote/logs/rsync_default_0020/stdout.log
- __MACOSX/released_code 3/distributional_robust/.remote/logs/rsync_default_0020/._stdout.log
- released_code 3/distributional_robust/.remote/logs/rsync_default_0020/exit_code
- __MACOSX/released_code 3/distributional_robust/.remote/logs/rsync_default_0020/._exit_code
- released_code 3/distributional_robust/.remote/logs/rsync_default_0027/stderr.log
- __MACOSX/released_code 3/distributional_robust/.remote/logs/rsync_default_0027/._stderr.log
- released_code 3/distributional_robust/.remote/logs/rsync_default_0027/stdout.log
- __MACOSX/released_code 3/distributional_robust/.remote/logs/rsync_default_0027/._stdout.log
- released_code 3/distributional_robust/.remote/logs/rsync_default_0027/exit_code
- __MACOSX/released_code 3/distributional_robust/.remote/logs/rsync_default_0027/._exit_code
- released_code 3/distributional_robust/.remote/logs/rsync_default_0018/stderr.log
- __MACOSX/released_code 3/distributional_robust/.remote/logs/rsync_default_0018/._stderr.log
- released_code 3/distributional_robust/.remote/logs/rsync_default_0018/stdout.log
- __MACOSX/released_code 3/distributional_robust/.remote/logs/rsync_default_0018/._stdout.log
- released_code 3/distributional_robust/.remote/logs/rsync_default_0018/exit_code
- __MACOSX/released_code 3/distributional_robust/.remote/logs/rsync_default_0018/._exit_code
- released_code 3/distributional_robust/.remote/logs/rsync_default_0011/stderr.log
- __MACOSX/released_code 3/distributional_robust/.remote/logs/rsync_default_0011/._stderr.log
- released_code 3/distributional_robust/.remote/logs/rsync_default_0011/stdout.log
- __MACOSX/released_code 3/distributional_robust/.remote/logs/rsync_default_0011/._stdout.log
- released_code 3/distributional_robust/.remote/logs/rsync_default_0011/exit_code
- __MACOSX/released_code 3/distributional_robust/.remote/logs/rsync_default_0011/._exit_code
- released_code 3/distributional_robust/.remote/logs/rsync_default_0016/stderr.log
- __MACOSX/released_code 3/distributional_robust/.remote/logs/rsync_default_0016/._stderr.log
- released_code 3/distributional_robust/.remote/logs/rsync_default_0016/stdout.log
- __MACOSX/released_code 3/distributional_robust/.remote/logs/rsync_default_0016/._stdout.log
- released_code 3/distributional_robust/.remote/logs/rsync_default_0016/exit_code
- __MACOSX/released_code 3/distributional_robust/.remote/logs/rsync_default_0016/._exit_code
- released_code 3/distributional_robust/.remote/logs/rsync_default_0029/stderr.log
- __MACOSX/released_code 3/distributional_robust/.remote/logs/rsync_default_0029/._stderr.log
- released_code 3/distributional_robust/.remote/logs/rsync_default_0029/stdout.log
- __MACOSX/released_code 3/distributional_robust/.remote/logs/rsync_default_0029/._stdout.log
- released_code 3/distributional_robust/.remote/logs/rsync_default_0029/exit_code
- __MACOSX/released_code 3/distributional_robust/.remote/logs/rsync_default_0029/._exit_code
- released_code 3/distributional_robust/.remote/logs/rsync_default_0042/stderr.log
- __MACOSX/released_code 3/distributional_robust/.remote/logs/rsync_default_0042/._stderr.log
- released_code 3/distributional_robust/.remote/logs/rsync_default_0042/stdout.log
- __MACOSX/released_code 3/distributional_robust/.remote/logs/rsync_default_0042/._stdout.log
- released_code 3/distributional_robust/.remote/logs/rsync_default_0042/exit_code
- __MACOSX/released_code 3/distributional_robust/.remote/logs/rsync_default_0042/._exit_code
- released_code 3/distributional_robust/.remote/logs/rsync_default_0045/stderr.log
- __MACOSX/released_code 3/distributional_robust/.remote/logs/rsync_default_0045/._stderr.log
- released_code 3/distributional_robust/.remote/logs/rsync_default_0045/stdout.log
- __MACOSX/released_code 3/distributional_robust/.remote/logs/rsync_default_0045/._stdout.log
- released_code 3/distributional_robust/.remote/logs/rsync_default_0045/exit_code
- __MACOSX/released_code 3/distributional_robust/.remote/logs/rsync_default_0045/._exit_code
- released_code 3/distributional_robust/.remote/logs/rsync_default_0030/stderr.log
- __MACOSX/released_code 3/distributional_robust/.remote/logs/rsync_default_0030/._stderr.log
- released_code 3/distributional_robust/.remote/logs/rsync_default_0030/stdout.log
- __MACOSX/released_code 3/distributional_robust/.remote/logs/rsync_default_0030/._stdout.log
- released_code 3/distributional_robust/.remote/logs/rsync_default_0030/exit_code
- __MACOSX/released_code 3/distributional_robust/.remote/logs/rsync_default_0030/._exit_code
- released_code 3/distributional_robust/.remote/logs/rsync_default_0008/stderr.log
- __MACOSX/released_code 3/distributional_robust/.remote/logs/rsync_default_0008/._stderr.log
- released_code 3/distributional_robust/.remote/logs/rsync_default_0008/stdout.log
- __MACOSX/released_code 3/distributional_robust/.remote/logs/rsync_default_0008/._stdout.log
- released_code 3/distributional_robust/.remote/logs/rsync_default_0008/exit_code
- __MACOSX/released_code 3/distributional_robust/.remote/logs/rsync_default_0008/._exit_code
- released_code 3/distributional_robust/.remote/logs/rsync_default_0037/stderr.log
- __MACOSX/released_code 3/distributional_robust/.remote/logs/rsync_default_0037/._stderr.log
- released_code 3/distributional_robust/.remote/logs/rsync_default_0037/stdout.log
- __MACOSX/released_code 3/distributional_robust/.remote/logs/rsync_default_0037/._stdout.log
- released_code 3/distributional_robust/.remote/logs/rsync_default_0037/exit_code
- __MACOSX/released_code 3/distributional_robust/.remote/logs/rsync_default_0037/._exit_code
- released_code 3/distributional_robust/.remote/logs/rsync_default_0001/stderr.log
- __MACOSX/released_code 3/distributional_robust/.remote/logs/rsync_default_0001/._stderr.log
[truncated: 118 more entries]
