# Supplementary material
Source: ML conference proceedings conference paper supplement (https://proceedings.neurips.cc/paper_files/paper/2022/hash/488b8db9ec118c3d750c34d1812a5a3a-Abstract.html)
Supplement: Supplementary file 1 [file 488b8db9ec118c3d750c34d1812a5a3a-Supplemental-Conference.zip › released_code 3/distributional_robust/.remote/logs/rsync_default_0001/stdout.log]

building file list ... done
created directory /cluster/home/xiangli48/nips22_robust_adv
./
README.md
ift6135_projet.ipynb
main.py
mnist.py

sent 647904 bytes  received 114 bytes  117821.45 bytes/sec
total size is 951533  speedup is 1.47
