# Supplementary material
Source: ML conference proceedings conference paper supplement (https://proceedings.neurips.cc/paper_files/paper/2022/hash/488b8db9ec118c3d750c34d1812a5a3a-Abstract.html)
Supplement: Supplementary file 1 [file 488b8db9ec118c3d750c34d1812a5a3a-Supplemental-Conference.zip › released_code 3/distributional_robust/.remote/logs/rsync_default_0033/stdout.log]

building file list ... done
./
run.sh

sent 398 bytes  received 60 bytes  83.27 bytes/sec
total size is 954699  speedup is 2084.50
