# Supplementary material
Source: ML conference proceedings conference paper supplement (https://proceedings.neurips.cc/paper_files/paper/2022/hash/488b8db9ec118c3d750c34d1812a5a3a-Abstract.html)
Supplement: Supplementary file 1 [file 488b8db9ec118c3d750c34d1812a5a3a-Supplemental-Conference.zip › released_code 3/distributional_robust/.remote/logs/rsync_default_0034/stderr.log]

The following have been reloaded with a version change:
  1) cuda/11.0.3 => cuda/11.4.2     2) cudnn/8.0.5 => cudnn/8.2.4.15
