# Supplementary material
Source: ML conference proceedings conference paper supplement (https://proceedings.neurips.cc/paper_files/paper/2022/hash/488b8db9ec118c3d750c34d1812a5a3a-Abstract.html)
Supplement: Supplementary file 1 [file 488b8db9ec118c3d750c34d1812a5a3a-Supplemental-Conference.zip › released_code 3/distributional_robust/.remote/logs/rsync_default_0035/stdout.log]

building file list ... done
./
main.py
run.sh

sent 442 bytes  received 268 bytes  157.78 bytes/sec
total size is 954772  speedup is 1344.75
