# Supplementary material
Source: ML conference proceedings conference paper supplement (https://proceedings.neurips.cc/paper_files/paper/2022/hash/488b8db9ec118c3d750c34d1812a5a3a-Abstract.html)
Supplement: Supplementary file 1 [file 488b8db9ec118c3d750c34d1812a5a3a-Supplemental-Conference.zip › released_code 3/distributional_robust/run.sh]

python main.py  \
        --lr_x 0.01 \
        --lr_y 0.08

python main.py  \
        --lr_x 0.01 \
        --lr_y 0.08 \
        --stop_scale 0.1 \
        --our

python main.py  \
        --lr_x 0.01 \
        --lr_y 0.01

python main.py  \
        --lr_x 0.01 \
        --lr_y 0.01 \
        --stop_scale 0.1 \
        --our
