# Supplementary material
Source: ML conference proceedings conference paper supplement (https://proceedings.neurips.cc/paper_files/paper/2022/hash/488b8db9ec118c3d750c34d1812a5a3a-Abstract.html)
Supplement: Supplementary file 1 [file 488b8db9ec118c3d750c34d1812a5a3a-Supplemental-Conference.zip › released_code 3/distributional_robust/run_mnist.sh]

for eps in 0.1 0.05 0.02
do

python mnist.py  \
        --lr_x 0.001 \
        --lr_y 0.001 \
        --epsilon "$eps" \
        --n_epoch 200

python mnist.py  \
        --our \
        --lr_x 0.001 \
        --lr_y 0.001 \
        --epsilon "$eps" \
        --n_epoch 200

python mnist.py  \
        --lr_x 0.001 \
        --lr_y 0.01 \
        --epsilon "$eps" \
        --n_epoch 200

python mnist.py  \
        --our \
        --lr_x 0.001 \
        --lr_y 0.01 \
        --epsilon "$eps" \
        --n_epoch 200

done
