# Supplementary material
Source: ML conference proceedings conference paper supplement (https://proceedings.neurips.cc/paper_files/paper/2022/hash/488b8db9ec118c3d750c34d1812a5a3a-Abstract.html)
Supplement: Supplementary file 1 [file 488b8db9ec118c3d750c34d1812a5a3a-Supplemental-Conference.zip › released_code 3/README.md]

We adapted code from https://github.com/Louis-udm/Reproducing-certifiable-distributional-robustness

Please install the following packages of Python before running the code:
- pytorch
- matplotlib
- numpy
- tensorflow
- tensorboard

To get the results for test functions, please run
````
cd test_func
bash run.sh
````
The figures will be saved in current path.

To get the results for distributional robustness optimization, please run
````
cd distributional_robust
bash run.sh  # for synthetic dataset
bash run_mnist.sh  # for MNIST dataset
````
We use tensorboard to record the experimental data. To see the results, please use
````
tensorboard --logdir logs
````
